# Supplementary material for: Cell cycle arrest of human bronchial epithelial cells modulated by differences in chemical components of particulate matter
Source: Royal Society of Chemistry journal article supplement (doi:10.1039/d0ra10563e), 2021-01-01
Supplement: d0ra10563e1.pdf [file d0ra10563e1.pdf]

**Table S1.** Air quality parameters of the sampling sites during the sampling period

| Site           | Date              | AQI <sup>a</sup> | Visibility (km) <sup>b</sup> | Sample type |
|----------------|-------------------|------------------|------------------------------|-------------|
| S <sub>1</sub> | March 28, 2015    | 163              | 8.2                          | Dust        |
|                | March 29, 2015    | 166              | 8.4                          | Dust        |
|                | April 17, 2015    | 112              | 9.3                          | Haze        |
| S <sub>2</sub> | April 9, 2015     | 212              | 7.4                          | Haze        |
|                | April 15, 2015    | 168              | 8.6                          | Haze        |
| S <sub>3</sub> | March 16, 2015    | 257              | 6.7                          | Haze        |
|                | March 17, 2015    | 233              | 7.2                          | Haze        |
| S <sub>4</sub> | November 12, 2015 | 205              | 7.6                          | Haze        |
|                | November 13, 2015 | 258              | 6.6                          | Haze        |
|                | November 14, 2015 | 324              | 6.1                          | Haze        |

<sup>a</sup> The data is obtained from China Environmental Monitoring Station (<http://www.cnemc.cn>). Air quality index (AQI) is a dimensionless index, which describes the comprehensive pollution status of air quality. AQI includes the levels of six pollutants including SO<sub>2</sub>, NO<sub>2</sub>, PM<sub>10</sub>, PM<sub>2.5</sub>, CO and O<sub>3</sub>. AQI values related to human health can be classified into six classes. Class I: 0-50, Good; Class II: 51-100, Moderate; Class III: 101-150, Unhealthy for sensitive Groups; Class IV: 151-200, Unhealthy; Class V: 201-300, Very unhealthy; Class VI: 300-500, Hazardous (Zhao et al., 2018).

<sup>b</sup> The data is obtained from China Environmental Monitoring Station (<http://www.cnemc.cn>).

Zhao, R., Cui, K. R., Wang, W. W., Wang, L. C., and Yan, P., 2018. Atmospheric PM<sub>2.5</sub> and total PCDD/Fs-WHO<sub>2005</sub>-TEQ level: A case of Handan and Kaifeng cities, China. *Aerosol Air Quality Research*. 18:994-1007.
